# Supplementary material
Source: Springer Nature journal article supplement (https://www.springermedizin.de/resource/supplementary/12885_2013_5201_MOESM5_ESM.pdf/9466174)

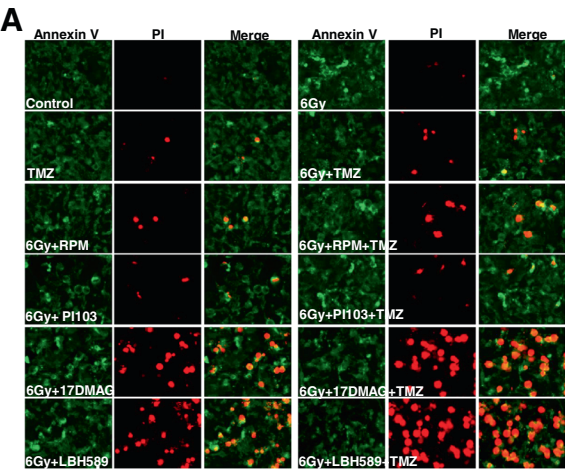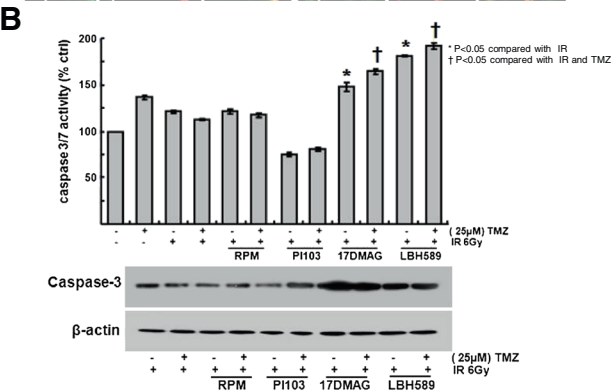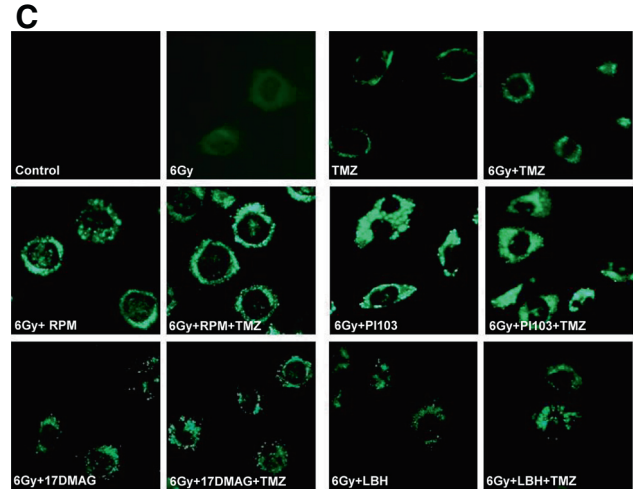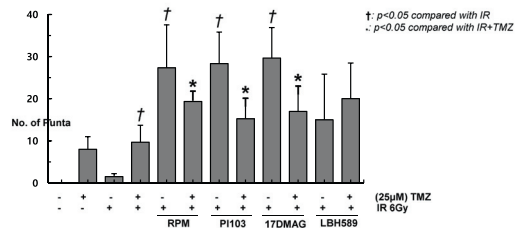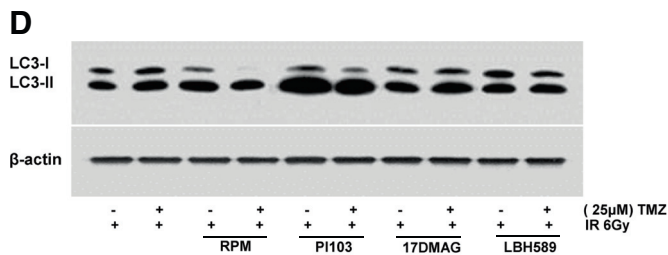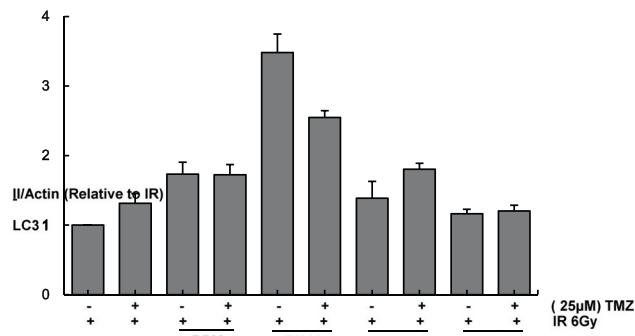

Supplement: MOESM5 [file 9466174]
